# Supplementary material for: The Gingiva from the Tissue Surrounding the Bone to the Tissue Regenerating the Bone: A Systematic Review of the Osteogenic Capacity of Gingival Mesenchymal Stem Cells in Preclinical Studies
Source: Hindawi journal article supplement (doi:10.1155/2021/6698100), 2021-06-12
Supplement: f4 [file 6698100.f4.pdf]

**Table: Quality assessment of in vitro studies depending on the Guidelines for Reporting Pre-clinical In Vitro Studies on Dental Materials which was based on the modification of CONSORT checklist.**

| Item | Abedian et al., 2020 | Kamel et al., 2019 | Sun et al., 2019 | Xing et al., 2019 | Angelopoulos et al., 2018 | Zhang et al., 2018 | Ghaderi et al., 2018 | Aboushady et al., 2018 | Ansari et al., 2017 | Kaibuchi et al., 2017 | Gao et al., 2014 | Gay et al., 2013 | Yang et al., 2013 | Moshaverinia et al., 2012 | Zorin et al., 2014 | Moshaverinia et al., 2013 | Otabe et al., 2012 | Mensing et al., 2011 | Fournier et al., 2010 | Tomar et al., 2010 |      |
|------|----------------------|--------------------|------------------|-------------------|---------------------------|--------------------|----------------------|------------------------|---------------------|-----------------------|------------------|------------------|-------------------|---------------------------|--------------------|---------------------------|--------------------|----------------------|-----------------------|--------------------|------|
| 1    | Yes                  | Yes                | Yes              | Yes               | Yes                       | Yes                | Yes                  | Yes                    | Yes                 | Yes                   | Yes              | Yes              | Yes               | Yes                       | Yes                | Yes                       | Yes                | Yes                  | Yes                   | Yes                | Yes  |
| 2a   | Yes#                 | Yes                | Yes              | Yes               | Yes                       | Yes                | Yes                  | Yes#                   | Yes                 | Yes                   | Yes#             | Yes              | Yes               | Yes                       | Yes                | Yes                       | Yes                | Yes                  | Yes                   | Yes#               | Yes# |
| 2b   | Yes                  | Yes                | Yes              | Yes               | Yes                       | Yes                | Yes#                 | Yes                    | Yes                 | Yes                   | Yes              | Yes              | Yes               | Yes                       | Yes                | Yes                       | Yes                | Yes                  | Yes                   | Yes#               | Yes  |
| 3    | Yes                  | Yes                | Yes              | Yes               | Yes                       | Yes                | Yes                  | Yes                    | Yes                 | Yes                   | Yes              | Yes              | Yes               | Yes                       | Yes                | Yes                       | Yes                | Yes                  | Yes                   | Yes                | Yes  |
| 4    | Yes                  | Yes                | Yes              | Yes               | Yes                       | Yes                | Yes                  | Yes                    | No                  | No                    | Yes              | Yes              | Yes               | Yes                       | No                 | Yes                       | Yes                | Yes                  | Yes                   | Yes                | Yes  |
| 5    | No                   | No                 | No               | No                | No                        | No                 | No                   | No                     | No                  | No                    | No               | No               | No                | No                        | No                 | No                        | No                 | No                   | No                    | No                 | No   |
| 6    | No                   | No                 | No               | No                | No                        | Yes#               | No                   | No                     | No                  | No                    | No               | No               | No                | No                        | No                 | No                        | No                 | No                   | No                    | No                 | No   |
| 7    | No                   | No                 | No               | Yes#              | No                        | Yes#               | No                   | No                     | No                  | No                    | No               | No               | Yes#              | No                        | No                 | No                        | No                 | No                   | No                    | No                 | No   |
| 8    | No                   | No                 | No               | No                | No                        | No                 | No                   | No                     | No                  | No                    | No               | No               | No                | No                        | No                 | No                        | No                 | No                   | No                    | No                 | No   |
| 9    | No                   | No                 | No               | No                | No                        | No                 | No                   | No                     | No                  | No                    | No               | No               | No                | No                        | No                 | No                        | No                 | No                   | No                    | No                 | No   |
| 10   | Yes                  | Yes                | Yes              | Yes               | Yes                       | Yes                | Yes#                 | Yes                    | Yes                 | Yes                   | Yes              | Yes              | Yes               | Yes                       | Yes                | Yes                       | Yes                | Yes                  | Yes                   | Yes*               | Yes* |
| 11   | Yes                  | Yes                | Yes              | Yes               | Yes                       | Yes                | Yes#                 | Yes                    | Yes#                | Yes                   | Yes              | Yes              | Yes               | Yes                       | Yes                | Yes                       | Yes                | Yes                  | Yes                   | Yes                | Yes  |
| 12   | No                   | No                 | Yes+             | No                | No                        | Yes                | No                   | No                     | Yes                 | Yes                   | No               | No               | Yes               | Yes                       | Yes                | Yes                       | Yes                | Yes                  | Yes                   | No                 | No   |
| 13   | Yes                  | Yes°               | Yes              | Yes               | Yes                       | Yes                | No                   | No                     | Yes                 | Yes                   | No               | Yes              | Yes               | Yes                       | Yes                | Yes                       | Yes                | Yes                  | Yes                   | Yes                | Yes  |
| 14   | No                   | Yes°               | Yes°             | Yes°              | Yes°                      | Yes°               | Yes°                 | Yes°                   | Yes°                | Yes°                  | Yes°             | Yes°             | Yes°              | Yes°                      | Yes°               | Yes°                      | Yes°               | Yes°                 | Yes°                  | Yes°               | Yes° |

*Yes#; reported but not enough, Yes\*; reported but not presented well, Yes°; protocol was approved by local authority without web registration.*
